# Supplementary material for: Controversies and evidence of hepatic resection for hepatocellular carcinoma
Source: PubMed Central journal article supplement — BBA Clin. 2016 Oct 11;6:125–30. doi: 10.1016/j.bbacli.2016.10.001 (PMC5067978; doi:10.1016/j.bbacli.2016.10.001), 2016-10-11
Supplement: mmc1.pdf [file mmc1.pdf]

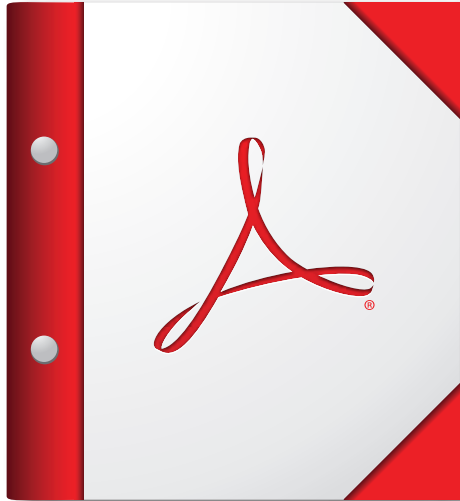

**For the best experience, open this PDF portfolio in  
Acrobat 9 or Adobe Reader 9, or later.**

[Get Adobe Reader Now!](#)
